# Supplementary material for: Multi-Locus Sequence Analysis Indicates Potential Cryptic Speciation in the Chigger Mite Neoschoengastia gallinarum (Hatori, 1920) Parasitising Birds in Asia
Source: Animals (Basel). 2024 Mar 21;14(6):980. doi: 10.3390/ani14060980 (PMC10967278; doi:10.3390/ani14060980)
Supplement: Supplementary file 1 [file animals-14-00980-s001.zip › Additional File S2.xls]

## Sheet: S1. Pairwise Dist. Concat. 
	SWX3	SWX10	SWX12	SWX13	SWX14	SWX15	SWX19	SWX21	SWX22	SWX23	SWX37	SWX40	SWX43	KPGX5	KPGX6	KPGX9	KPGX10	KPGX11	KPGX18	KPGX19	KPGX20	KPGX21	JWX3	JWX17	JWX18	JWX20	KTX7	KTX8	CHX2	UMPX2	BNANX2	BNANX8	BNANX9	BNANX10	BNANX11	BNANX12	BNANX13	BNANX14	BNANX15	BNANX16	BNANX17	BNANX19	BNANX20	BNANX21	BNANX22	NGY1	NGY3	NGY7	NGY8
SWX3
SWX10	0.000694492
SWX12	0	0.000694492
SWX13	0.00208861	0.00139064	0.00208861
SWX14	0.00278673	0.00208778	0.00278673	0.00069518
SWX15	0.00208862	0.00139064	0.00208862	0	0.000694697
SWX19	0.00278673	0.00208778	0.00278673	0.00069518	0	0.000694697
SWX21	0	0.000694492	0	0.00208861	0.00278673	0.00208862	0.00278673
SWX22	0.00208862	0.00139064	0.00208862	0	0.000694697	1.11022e-16	0.000694697	0.00208862
SWX23	0.00278673	0.00208778	0.00278673	0.00069518	0	0.000694697	0	0.00278673	0.000694697
SWX37	0.00208716	0.00138967	0.00208716	0	0.000694697	1.11022e-16	0.000694697	0.00208716	1.11022e-16	0.000694697
SWX40	0.00208862	0.00139064	0.00208862	0	0.000694697	1.11022e-16	0.000694697	0.00208862	1.11022e-16	0.000694697	1.11022e-16
SWX43	0.00208716	0.0027867	0.00208716	0.00139198	0.00208862	0.00139199	0.00208862	0.00208716	0.00139199	0.00208862	0.00139102	0.00139199
KPGX5	0.0034853	0.00278479	0.0034853	0.00139064	0.00208778	0.00139064	0.00208778	0.0034853	0.00139064	0.00208778	0.00138967	0.00139064	0.0027867
KPGX6	0.00208862	0.00139064	0.00208862	0	0.000694697	1.11022e-16	0.000694697	0.00208862	1.11022e-16	0.000694697	1.11022e-16	1.11022e-16	0.00139199	0.00139064
KPGX9	0.00208716	0.00138967	0.00208716	0	0.000694697	1.11022e-16	0.000694697	0.00208716	1.11022e-16	0.000694697	0	1.11022e-16	0.00139102	0.00138967	1.11022e-16
KPGX10	0.00208862	0.00139064	0.00208862	0	0.000694697	1.11022e-16	0.000694697	0.00208862	1.11022e-16	0.000694697	1.11022e-16	1.11022e-16	0.00139199	0.00139064	1.11022e-16	1.11022e-16
KPGX11	0.00278479	0.00208632	0.00278479	0.000694697	0.00139087	0.000694697	0.00139087	0.00278479	0.000694697	0.00139087	0.000694215	0.000694697	0.00208716	0.00208633	0.000694697	0.000694215	0.000694697
KPGX18	0.00278864	0.00208861	0.00278864	0.000695458	0.00139161	0.000695459	0.00139161	0.00278864	0.000695459	0.00139161	0.000694975	0.000695459	0.00209103	0.00208862	0.000695459	0.000694975	0.000695459	0.00139064
KPGX19	0.00349072	0.00278864	0.00349072	0.00139295	0.00208862	0.00139198	0.00208862	0.00349072	0.00139198	0.00208862	0.00139198	0.00139198	0.00279214	0.00278864	0.00139198	0.00139198	0.00139198	0.00208862	0.00209249
KPGX20	0.00208862	0.00139064	0.00208862	0	0.000694697	1.11022e-16	0.000694697	0.00208862	1.11022e-16	0.000694697	1.11022e-16	1.11022e-16	0.00139199	0.00139064	1.11022e-16	1.11022e-16	1.11022e-16	0.000694697	0.000695459	0.00139198
KPGX21	0.00208862	0.00139064	0.00208862	0	0.000694697	1.11022e-16	0.000694697	0.00208862	1.11022e-16	0.000694697	1.11022e-16	1.11022e-16	0.00139199	0.00139064	1.11022e-16	1.11022e-16	1.11022e-16	0.000694697	0.000695459	0.00139198	1.11022e-16
JWX3	0.00278673	0.00208778	0.00278673	0.00069518	0	0.000694697	0	0.00278673	0.000694697	0	0.000694697	0.000694697	0.00208862	0.00208778	0.000694697	0.000694697	0.000694697	0.00139087	0.00139161	0.00208862	0.000694697	0.000694697
JWX17	0.00208716	0.00138967	0.00208716	0	0.000694697	1.11022e-16	0.000694697	0.00208716	1.11022e-16	0.000694697	0	1.11022e-16	0.00139102	0.00138967	1.11022e-16	0	1.11022e-16	0.000694215	0.000694975	0.00139198	1.11022e-16	1.11022e-16	0.000694697
JWX18	0.00278673	0.00208778	0.00278673	0.00069518	0	0.000694697	0	0.00278673	0.000694697	0	0.000694697	0.000694697	0.00208862	0.00208778	0.000694697	0.000694697	0.000694697	0.00139087	0.00139161	0.00208862	0.000694697	0.000694697	0	0.000694697
JWX20	0.00278673	0.00208778	0.00278673	0.00069518	0	0.000694697	0	0.00278673	0.000694697	0	0.000694697	0.000694697	0.00208862	0.00208778	0.000694697	0.000694697	0.000694697	0.00139087	0.00139161	0.00208862	0.000694697	0.000694697	0	0.000694697	0
KTX7	0.00348529	0.00278478	0.00348529	0.00139064	0.00208778	0.00139064	0.00208778	0.00348529	0.00139064	0.00208778	0.00138967	0.00139064	0.0027867	0.00278479	0.00139064	0.00138967	0.00139064	0.000694492	0.00208861	0.00278864	0.00139064	0.00139064	0.00208778	0.00138967	0.00208778	0.00208778
KTX8	0.00208862	0.00139064	0.00208862	0	0.000694697	1.11022e-16	0.000694697	0.00208862	1.11022e-16	0.000694697	1.11022e-16	1.11022e-16	0.00139199	0.00139064	1.11022e-16	1.11022e-16	1.11022e-16	0.000694697	0.000695459	0.00139198	1.11022e-16	1.11022e-16	0.000694697	1.11022e-16	0.000694697	0.000694697	0.00139064
CHX2	0.00278673	0.00208778	0.00278673	0.00069518	0	0.000694697	0	0.00278673	0.000694697	0	0.000694697	0.000694697	0.00208862	0.00208778	0.000694697	0.000694697	0.000694697	0.00139087	0.00139161	0.00208862	0.000694697	0.000694697	0	0.000694697	0	0	0.00208778	0.000694697
UMPX2	0.00208716	0.00138967	0.00208716	0	0.000694697	1.11022e-16	0.000694697	0.00208716	1.11022e-16	0.000694697	0	1.11022e-16	0.00139102	0.00138967	1.11022e-16	0	1.11022e-16	0.000694215	0.000694975	0.00139198	1.11022e-16	1.11022e-16	0.000694697	0	0.000694697	0.000694697	0.00138967	1.11022e-16	0.000694697
BNANX2	0.03076	0.0315399	0.03076	0.0330905	0.0331328	0.0330916	0.0331328	0.03076	0.0330916	0.0331328	0.0330666	0.0330916	0.0330677	0.0345998	0.0330916	0.0330666	0.0330916	0.0330266	0.033878	0.0330916	0.0330916	0.0330916	0.0331328	0.0330666	0.0331328	0.0331328	0.0338112	0.0330916	0.0331328	0.0330666
BNANX8	0.03076	0.0315399	0.03076	0.0330905	0.0331328	0.0330916	0.0331328	0.03076	0.0330916	0.0331328	0.0330666	0.0330916	0.0330677	0.0345998	0.0330916	0.0330666	0.0330916	0.0330266	0.033878	0.0330916	0.0330916	0.0330916	0.0331328	0.0330666	0.0331328	0.0331328	0.0338112	0.0330916	0.0331328	0.0330666	1.11022e-16
BNANX9	0.0315399	0.0323221	0.0315399	0.0338769	0.0339204	0.033878	0.0339204	0.0315399	0.033878	0.0339204	0.0338524	0.033878	0.0338535	0.0353891	0.033878	0.0338524	0.033878	0.0338112	0.0346668	0.033878	0.033878	0.033878	0.0339204	0.0338524	0.0339204	0.0339204	0.0345981	0.033878	0.0339204	0.0338524	0.000694491	0.000694491
BNANX10	0.03076	0.0315399	0.03076	0.0330905	0.0331328	0.0330916	0.0331328	0.03076	0.0330916	0.0331328	0.0330666	0.0330916	0.0330677	0.0345998	0.0330916	0.0330666	0.0330916	0.0330266	0.033878	0.0330916	0.0330916	0.0330916	0.0331328	0.0330666	0.0331328	0.0331328	0.0338112	0.0330916	0.0331328	0.0330666	0.00139101	0.00139101	0.000694491
BNANX11	0.03076	0.0315399	0.03076	0.0330905	0.0331328	0.0330916	0.0331328	0.03076	0.0330916	0.0331328	0.0330666	0.0330916	0.0330677	0.0345998	0.0330916	0.0330666	0.0330916	0.0330266	0.033878	0.0330916	0.0330916	0.0330916	0.0331328	0.0330666	0.0331328	0.0331328	0.0338112	0.0330916	0.0331328	0.0330666	1.11022e-16	1.11022e-16	0.000694491	0.00139101
BNANX12	0.03076	0.0315399	0.03076	0.0330905	0.0331328	0.0330916	0.0331328	0.03076	0.0330916	0.0331328	0.0330666	0.0330916	0.0330677	0.0345998	0.0330916	0.0330666	0.0330916	0.0330266	0.033878	0.0330916	0.0330916	0.0330916	0.0331328	0.0330666	0.0331328	0.0331328	0.0338112	0.0330916	0.0331328	0.0330666	0.00139101	0.00139101	0.000694491	1.11022e-16	0.00139101
BNANX13	0.0323221	0.0331066	0.0323221	0.0346656	0.0347105	0.0346668	0.0347105	0.0323221	0.0346668	0.0347105	0.0346405	0.0346668	0.0346417	0.0361809	0.0346668	0.0346405	0.0346668	0.0345981	0.035458	0.0346668	0.0346668	0.0346668	0.0347105	0.0346405	0.0347105	0.0347105	0.0353874	0.0346668	0.0347105	0.0346405	0.00139101	0.00139101	0.000694491	0.00139101	0.00139101	0.00139101
BNANX14	0.0315399	0.0323221	0.0315399	0.0338769	0.0339204	0.033878	0.0339204	0.0315399	0.033878	0.0339204	0.0338524	0.033878	0.0338535	0.0353891	0.033878	0.0338524	0.033878	0.0338112	0.0346668	0.033878	0.033878	0.033878	0.0339204	0.0338524	0.0339204	0.0339204	0.0345981	0.033878	0.0339204	0.0338524	0.000694491	0.000694491	1.11022e-16	0.000694491	0.000694491	0.000694491	0.000694491
BNANX15	0.0323231	0.0331077	0.0323231	0.0346668	0.0347117	0.034668	0.0347117	0.0323231	0.034668	0.0347117	0.0346417	0.034668	0.0346429	0.0361822	0.034668	0.0346417	0.034668	0.0345992	0.0354593	0.034668	0.034668	0.034668	0.0347117	0.0346417	0.0347117	0.0347117	0.0353885	0.034668	0.0347117	0.0346417	0.00139101	0.00139101	0.000694491	0.00139101	0.00139101	0.00139101	0.00139101	0.000694491
BNANX16	0.0315399	0.0323221	0.0315399	0.0338769	0.0339204	0.033878	0.0339204	0.0315399	0.033878	0.0339204	0.0338524	0.033878	0.0338535	0.0353891	0.033878	0.0338524	0.033878	0.0338112	0.0346668	0.033878	0.033878	0.033878	0.0339204	0.0338524	0.0339204	0.0339204	0.0345981	0.033878	0.0339204	0.0338524	0.000694491	0.000694491	1.11022e-16	0.000694491	0.000694491	0.000694491	0.000694491	1.11022e-16	0.000694491
BNANX17	0.0315399	0.0323221	0.0315399	0.0338769	0.0339204	0.033878	0.0339204	0.0315399	0.033878	0.0339204	0.0338524	0.033878	0.0338535	0.0353891	0.033878	0.0338524	0.033878	0.0338112	0.0346668	0.033878	0.033878	0.033878	0.0339204	0.0338524	0.0339204	0.0339204	0.0345981	0.033878	0.0339204	0.0338524	0.000694491	0.000694491	1.11022e-16	0.000694491	0.000694491	0.000694491	0.000694491	1.11022e-16	0.000694491	1.11022e-16
BNANX19	0.03076	0.0315399	0.03076	0.0330905	0.0331328	0.0330916	0.0331328	0.03076	0.0330916	0.0331328	0.0330666	0.0330916	0.0330677	0.0345998	0.0330916	0.0330666	0.0330916	0.0330266	0.033878	0.0330916	0.0330916	0.0330916	0.0331328	0.0330666	0.0331328	0.0331328	0.0338112	0.0330916	0.0331328	0.0330666	1.11022e-16	1.11022e-16	0.000694491	0.00139101	1.11022e-16	0.00139101	0.00139101	0.000694491	0.00139101	0.000694491	0.000694491
BNANX20	0.0315399	0.0323221	0.0315399	0.0338769	0.0339204	0.033878	0.0339204	0.0315399	0.033878	0.0339204	0.0338524	0.033878	0.0338535	0.0353891	0.033878	0.0338524	0.033878	0.0338112	0.0346668	0.033878	0.033878	0.033878	0.0339204	0.0338524	0.0339204	0.0339204	0.0345981	0.033878	0.0339204	0.0338524	0.000694491	0.000694491	1.11022e-16	0.000694491	0.000694491	0.000694491	0.000694491	1.11022e-16	0.000694491	1.11022e-16	1.11022e-16	0.000694491
BNANX21	0.0323231	0.0331077	0.0323231	0.0346668	0.0347117	0.034668	0.0347117	0.0323231	0.034668	0.0347117	0.0346417	0.034668	0.0346429	0.0361822	0.034668	0.0346417	0.034668	0.0345992	0.0354593	0.034668	0.034668	0.034668	0.0347117	0.0346417	0.0347117	0.0347117	0.0353885	0.034668	0.0347117	0.0346417	0.00139101	0.00139101	0.000694491	0.00139101	0.00139101	0.00139101	0.00139101	0.000694491	1.11022e-16	0.000694491	0.000694491	0.00139101	0.000694491
BNANX22	0.0323221	0.0331066	0.0323221	0.0346656	0.0347105	0.0346668	0.0347105	0.0323221	0.0346668	0.0347105	0.0346405	0.0346668	0.0346417	0.0361809	0.0346668	0.0346405	0.0346668	0.0345981	0.035458	0.0346668	0.0346668	0.0346668	0.0347105	0.0346405	0.0347105	0.0347105	0.0353874	0.0346668	0.0347105	0.0346405	0.00139101	0.00139101	0.000694491	0.00139101	0.00139101	0.00139101	0.00139101	0.000694491	0.00139101	0.000694491	0.000694491	0.00139101	0.000694491	0.00139101
NGY1	0.0255307	0.026346	0.0255307	0.0264021	0.0271859	0.0264028	0.0271859	0.0255307	0.0264028	0.0271859	0.0263819	0.0264028	0.0263826	0.0279861	0.0264028	0.0263819	0.0264028	0.0271647	0.0272228	0.0255854	0.0264028	0.0264028	0.0271859	0.0263819	0.0271859	0.0271859	0.0279853	0.0264028	0.0271859	0.0263819	0.0279144	0.0279144	0.0287349	0.0287353	0.0279144	0.0287353	0.0295581	0.0287349	0.0295588	0.0287349	0.0287349	0.0279144	0.0287349	0.0295588	0.0295581
NGY3	0.0271647	0.026346	0.0271647	0.0247693	0.0255505	0.0247699	0.0255505	0.0271647	0.0247699	0.0255505	0.0247504	0.0247699	0.0263826	0.0263467	0.0247699	0.0247504	0.0247699	0.0255307	0.0255847	0.0239578	0.0247699	0.0247699	0.0255505	0.0247504	0.0255505	0.0255505	0.026346	0.0247699	0.0255505	0.0247504	0.0295588	0.0295588	0.0303847	0.0303851	0.0295588	0.0303851	0.0312131	0.0303847	0.031214	0.0303847	0.0303847	0.0295588	0.0303847	0.031214	0.0312131	0.00148388
NGY7	0.0279493	0.0287712	0.0279493	0.0288315	0.0288717	0.0288323	0.0288717	0.0279493	0.0288323	0.0288717	0.0288094	0.0288323	0.0288102	0.0304247	0.0288323	0.0288094	0.0288323	0.0287716	0.029659	0.0280083	0.0288323	0.0288323	0.0288717	0.0288094	0.0288717	0.0288717	0.0295961	0.0288323	0.0288717	0.0288094	0.0271293	0.0271293	0.0279486	0.0279489	0.0271293	0.0279489	0.0287704	0.0279486	0.0287712	0.0279486	0.0279486	0.0271293	0.0279486	0.0287712	0.0287704	0.00222656	0.00372189
NGY8	0.0279853	0.027164	0.0279853	0.025584	0.0263665	0.0255847	0.0263665	0.0279853	0.0255847	0.0263665	0.0255645	0.0255847	0.027202	0.0271647	0.0255847	0.0255645	0.0255847	0.026346	0.0264021	0.0247699	0.0255847	0.0255847	0.0263665	0.0255645	0.0263665	0.0263665	0.027164	0.0255847	0.0263665	0.0255645	0.0303847	0.0303847	0.0312131	0.0312136	0.0303847	0.0312136	0.0320442	0.0312131	0.0320452	0.0312131	0.0312131	0.0303847	0.0312131	0.0320452	0.0320442	0.00222927	0.00074079	0.00297306
NGF7	0.026346	0.02553	0.026346	0.025584	0.0263665	0.0255847	0.0263665	0.026346	0.0255847	0.0263665	0.0255645	0.0255847	0.027202	0.0271647	0.0255847	0.0255645	0.0255847	0.026346	0.0264021	0.0247699	0.0255847	0.0255847	0.0263665	0.0255645	0.0263665	0.0263665	0.027164	0.0255847	0.0263665	0.0255645	0.0287349	0.0287349	0.0295581	0.0295584	0.0287349	0.0295584	0.0303838	0.0295581	0.0303847	0.0295581	0.0295581	0.0287349	0.0295581	0.0303847	0.0303838	0.00074079	0.00074079	0.00297306	0.00148387
NGY5	0.026281	0.0270962	0.026281	0.0271505	0.0271859	0.0271512	0.0271859	0.026281	0.0271512	0.0271859	0.0271297	0.0271512	0.0271304	0.028736	0.0271512	0.0271297	0.0271512	0.0270966	0.0279711	0.0263338	0.0271512	0.0271512	0.0271859	0.0271297	0.0271859	0.0271859	0.0279144	0.0271512	0.0271859	0.0271297	0.00750122	0.00750122	0.0067406	0.0059824	0.00750122	0.0059824	0.00750116	0.0067406	0.00750122	0.0067406	0.0067406	0.00750122	0.0067406	0.00750122	0.00750116	0.0254984	0.0271297	0.0247176	0.0279489
NGFA4	0.0263124	0.0254978	0.0263124	0.0239252	0.0247056	0.0239257	0.0247056	0.0263124	0.0239257	0.0247056	0.023907	0.0239257	0.025531	0.0254984	0.0239257	0.023907	0.0239257	0.0246865	0.0247365	0.0231176	0.0239257	0.0239257	0.0247056	0.023907	0.0247056	0.0247056	0.0254978	0.0239257	0.0247056	0.023907	0.0105531	0.0105531	0.00978406	0.00901757	0.0105531	0.00901757	0.0105529	0.00978406	0.0105531	0.00978406	0.00978406	0.0105531	0.00978406	0.0105531	0.0105529	0.0255304	0.023907	0.0279489	0.0247171
[truncated: 3 more columns]

## Sheet: S2. Pairwise Distance COI
	SWX3	SWX10	SWX12	SWX13	SWX14	SWX15	SWX19	SWX21	SWX22	SWX23	SWX37	SWX40	SWX43	KPGX5	KPGX6	KPGX9	KPGX10	KPGX11	KPGX18	KPGX19	KPGX20	KPGX21	JWX3	JWX17	JWX18	JWX20	KTX7	KTX8	CHX2	UMPX2	BNANX2	BNANX8	BNANX9	BNANX10	BNANX11	BNANX12	BNANX13	BNANX14	BNANX15	BNANX16	BNANX17	BNANX19	BNANX20	BNANX21	BNANX22	NGY1	NGY3	NGY5	NGY7
SWX3
SWX10	0
SWX12	0	0
SWX13	0	0	0
SWX14	0	0	0	0
SWX15	0	0	0	0	0
SWX19	0	0	0	0	0	0
SWX21	0	0	0	0	0	0	0
SWX22	0	0	0	0	0	0	0	0
SWX23	0	0	0	0	0	0	0	0	0
SWX37	0	0	0	0	0	0	0	0	0	0
SWX40	0	0	0	0	0	0	0	0	0	0	0
SWX43	0	0	0	0	0	0	0	0	0	0	0	0
KPGX5	0	0	0	0	0	0	0	0	0	0	0	0	0
KPGX6	0	0	0	0	0	0	0	0	0	0	0	0	0	0
KPGX9	0	0	0	0	0	0	0	0	0	0	0	0	0	0	0
KPGX10	0	0	0	0	0	0	0	0	0	0	0	0	0	0	0	0
KPGX11	0	0	0	0	0	0	0	0	0	0	0	0	0	0	0	0	0
KPGX18	0	0	0	0	0	0	0	0	0	0	0	0	0	0	0	0	0	0
KPGX19	0.00366769	0.00366769	0.00366769	0.00366769	0.00366769	0.00366769	0.00366769	0.00366769	0.00366769	0.00366769	0.00366769	0.00366769	0.00366769	0.00366769	0.00366769	0.00366769	0.00366769	0.00366769	0.00366769
KPGX20	0	0	0	0	0	0	0	0	0	0	0	0	0	0	0	0	0	0	0	0.00366769
KPGX21	0	0	0	0	0	0	0	0	0	0	0	0	0	0	0	0	0	0	0	0.00366769	0
JWX3	0	0	0	0	0	0	0	0	0	0	0	0	0	0	0	0	0	0	0	0.00366769	0	0
JWX17	0	0	0	0	0	0	0	0	0	0	0	0	0	0	0	0	0	0	0	0.00366769	0	0	0
JWX18	0	0	0	0	0	0	0	0	0	0	0	0	0	0	0	0	0	0	0	0.00366769	0	0	0	0
JWX20	0	0	0	0	0	0	0	0	0	0	0	0	0	0	0	0	0	0	0	0.00366769	0	0	0	0	0
KTX7	0.00182597	0.00182597	0.00182597	0.00182597	0.00182597	0.00182597	0.00182597	0.00182597	0.00182597	0.00182597	0.00182597	0.00182597	0.00182597	0.00182597	0.00182597	0.00182597	0.00182597	0.00182597	0.00182597	0.00552522	0.00182597	0.00182597	0.00182597	0.00182597	0.00182597	0.00182597
KTX8	0	0	0	0	0	0	0	0	0	0	0	0	0	0	0	0	0	0	0	0.00366769	0	0	0	0	0	0	0.00182597
CHX2	0	0	0	0	0	0	0	0	0	0	0	0	0	0	0	0	0	0	0	0.00366769	0	0	0	0	0	0	0.00182597	0
UMPX2	0	0	0	0	0	0	0	0	0	0	0	0	0	0	0	0	0	0	0	0.00366769	0	0	0	0	0	0	0.00182597	0	0
BNANX2	0.0855017	0.0855017	0.0855017	0.0855017	0.0855017	0.0855017	0.0855017	0.0855017	0.0855017	0.0855017	0.0855017	0.0855017	0.0855017	0.0855017	0.0855017	0.0855017	0.0855017	0.0855017	0.0855017	0.0855017	0.0855017	0.0855017	0.0855017	0.0855017	0.0855017	0.0855017	0.0880564	0.0855017	0.0855017	0.0855017
BNANX8	0.0855017	0.0855017	0.0855017	0.0855017	0.0855017	0.0855017	0.0855017	0.0855017	0.0855017	0.0855017	0.0855017	0.0855017	0.0855017	0.0855017	0.0855017	0.0855017	0.0855017	0.0855017	0.0855017	0.0855017	0.0855017	0.0855017	0.0855017	0.0855017	0.0855017	0.0855017	0.0880564	0.0855017	0.0855017	0.0855017	0
BNANX9	0.0880564	0.0880564	0.0880564	0.0880564	0.0880564	0.0880564	0.0880564	0.0880564	0.0880564	0.0880564	0.0880564	0.0880564	0.0880564	0.0880564	0.0880564	0.0880564	0.0880564	0.0880564	0.0880564	0.0880564	0.0880564	0.0880564	0.0880564	0.0880564	0.0880564	0.0880564	0.0906345	0.0880564	0.0880564	0.0880564	0.00182592	0.00182592
BNANX10	0.0855017	0.0855017	0.0855017	0.0855017	0.0855017	0.0855017	0.0855017	0.0855017	0.0855017	0.0855017	0.0855017	0.0855017	0.0855017	0.0855017	0.0855017	0.0855017	0.0855017	0.0855017	0.0855017	0.0855017	0.0855017	0.0855017	0.0855017	0.0855017	0.0855017	0.0855017	0.0880564	0.0855017	0.0855017	0.0855017	0.00366749	0.00366749	0.00182592
BNANX11	0.0855017	0.0855017	0.0855017	0.0855017	0.0855017	0.0855017	0.0855017	0.0855017	0.0855017	0.0855017	0.0855017	0.0855017	0.0855017	0.0855017	0.0855017	0.0855017	0.0855017	0.0855017	0.0855017	0.0855017	0.0855017	0.0855017	0.0855017	0.0855017	0.0855017	0.0855017	0.0880564	0.0855017	0.0855017	0.0855017	0	0	0.00182592	0.00366749
BNANX12	0.0855017	0.0855017	0.0855017	0.0855017	0.0855017	0.0855017	0.0855017	0.0855017	0.0855017	0.0855017	0.0855017	0.0855017	0.0855017	0.0855017	0.0855017	0.0855017	0.0855017	0.0855017	0.0855017	0.0855017	0.0855017	0.0855017	0.0855017	0.0855017	0.0855017	0.0855017	0.0880564	0.0855017	0.0855017	0.0855017	0.00366749	0.00366749	0.00182592	0	0.00366749
BNANX13	0.0880564	0.0880564	0.0880564	0.0880564	0.0880564	0.0880564	0.0880564	0.0880564	0.0880564	0.0880564	0.0880564	0.0880564	0.0880564	0.0880564	0.0880564	0.0880564	0.0880564	0.0880564	0.0880564	0.0880564	0.0880564	0.0880564	0.0880564	0.0880564	0.0880564	0.0880564	0.0906345	0.0880564	0.0880564	0.0880564	0.00182592	0.00182592	1.11022e-16	0.00182592	0.00182592	0.00182592
BNANX14	0.0880564	0.0880564	0.0880564	0.0880564	0.0880564	0.0880564	0.0880564	0.0880564	0.0880564	0.0880564	0.0880564	0.0880564	0.0880564	0.0880564	0.0880564	0.0880564	0.0880564	0.0880564	0.0880564	0.0880564	0.0880564	0.0880564	0.0880564	0.0880564	0.0880564	0.0880564	0.0906345	0.0880564	0.0880564	0.0880564	0.00182592	0.00182592	1.11022e-16	0.00182592	0.00182592	0.00182592	1.11022e-16
BNANX15	0.0880564	0.0880564	0.0880564	0.0880564	0.0880564	0.0880564	0.0880564	0.0880564	0.0880564	0.0880564	0.0880564	0.0880564	0.0880564	0.0880564	0.0880564	0.0880564	0.0880564	0.0880564	0.0880564	0.0880564	0.0880564	0.0880564	0.0880564	0.0880564	0.0880564	0.0880564	0.0906345	0.0880564	0.0880564	0.0880564	0.00182592	0.00182592	1.11022e-16	0.00182592	0.00182592	0.00182592	1.11022e-16	1.11022e-16
BNANX16	0.0880564	0.0880564	0.0880564	0.0880564	0.0880564	0.0880564	0.0880564	0.0880564	0.0880564	0.0880564	0.0880564	0.0880564	0.0880564	0.0880564	0.0880564	0.0880564	0.0880564	0.0880564	0.0880564	0.0880564	0.0880564	0.0880564	0.0880564	0.0880564	0.0880564	0.0880564	0.0906345	0.0880564	0.0880564	0.0880564	0.00182592	0.00182592	1.11022e-16	0.00182592	0.00182592	0.00182592	1.11022e-16	1.11022e-16	1.11022e-16
BNANX17	0.0880564	0.0880564	0.0880564	0.0880564	0.0880564	0.0880564	0.0880564	0.0880564	0.0880564	0.0880564	0.0880564	0.0880564	0.0880564	0.0880564	0.0880564	0.0880564	0.0880564	0.0880564	0.0880564	0.0880564	0.0880564	0.0880564	0.0880564	0.0880564	0.0880564	0.0880564	0.0906345	0.0880564	0.0880564	0.0880564	0.00182592	0.00182592	1.11022e-16	0.00182592	0.00182592	0.00182592	1.11022e-16	1.11022e-16	1.11022e-16	1.11022e-16
BNANX19	0.0855017	0.0855017	0.0855017	0.0855017	0.0855017	0.0855017	0.0855017	0.0855017	0.0855017	0.0855017	0.0855017	0.0855017	0.0855017	0.0855017	0.0855017	0.0855017	0.0855017	0.0855017	0.0855017	0.0855017	0.0855017	0.0855017	0.0855017	0.0855017	0.0855017	0.0855017	0.0880564	0.0855017	0.0855017	0.0855017	0	0	0.00182592	0.00366749	0	0.00366749	0.00182592	0.00182592	0.00182592	0.00182592	0.00182592
BNANX20	0.0880564	0.0880564	0.0880564	0.0880564	0.0880564	0.0880564	0.0880564	0.0880564	0.0880564	0.0880564	0.0880564	0.0880564	0.0880564	0.0880564	0.0880564	0.0880564	0.0880564	0.0880564	0.0880564	0.0880564	0.0880564	0.0880564	0.0880564	0.0880564	0.0880564	0.0880564	0.0906345	0.0880564	0.0880564	0.0880564	0.00182592	0.00182592	1.11022e-16	0.00182592	0.00182592	0.00182592	1.11022e-16	1.11022e-16	1.11022e-16	1.11022e-16	1.11022e-16	0.00182592
BNANX21	0.0880564	0.0880564	0.0880564	0.0880564	0.0880564	0.0880564	0.0880564	0.0880564	0.0880564	0.0880564	0.0880564	0.0880564	0.0880564	0.0880564	0.0880564	0.0880564	0.0880564	0.0880564	0.0880564	0.0880564	0.0880564	0.0880564	0.0880564	0.0880564	0.0880564	0.0880564	0.0906345	0.0880564	0.0880564	0.0880564	0.00182592	0.00182592	1.11022e-16	0.00182592	0.00182592	0.00182592	1.11022e-16	1.11022e-16	1.11022e-16	1.11022e-16	1.11022e-16	0.00182592	1.11022e-16
BNANX22	0.0880564	0.0880564	0.0880564	0.0880564	0.0880564	0.0880564	0.0880564	0.0880564	0.0880564	0.0880564	0.0880564	0.0880564	0.0880564	0.0880564	0.0880564	0.0880564	0.0880564	0.0880564	0.0880564	0.0880564	0.0880564	0.0880564	0.0880564	0.0880564	0.0880564	0.0880564	0.0906345	0.0880564	0.0880564	0.0880564	0.00182592	0.00182592	1.11022e-16	0.00182592	0.00182592	0.00182592	1.11022e-16	1.11022e-16	1.11022e-16	1.11022e-16	1.11022e-16	0.00182592	1.11022e-16	1.11022e-16
NGY1	0.0812156	0.0812156	0.0812156	0.0812156	0.0812156	0.0812156	0.0812156	0.0812156	0.0812156	0.0812156	0.0812156	0.0812156	0.0812156	0.0812156	0.0812156	0.0812156	0.0812156	0.0812156	0.0812156	0.0782339	0.0812156	0.0812156	0.0812156	0.0812156	0.0812156	0.0812156	0.0842299	0.0812156	0.0812156	0.0812156	0.0837554	0.0837554	0.0867815	0.0868074	0.0837554	0.0868074	0.0867815	0.0867815	0.0867815	0.0867815	0.0867815	0.0837554	0.0867815	0.0867815	0.0867815
NGY3	0.0812156	0.0812156	0.0812156	0.0812156	0.0812156	0.0812156	0.0812156	0.0812156	0.0812156	0.0812156	0.0812156	0.0812156	0.0812156	0.0812156	0.0812156	0.0812156	0.0812156	0.0812156	0.0812156	0.0782339	0.0812156	0.0812156	0.0812156	0.0812156	0.0812156	0.0812156	0.0842299	0.0812156	0.0812156	0.0812156	0.0837554	0.0837554	0.0867815	0.0868074	0.0837554	0.0868074	0.0867815	0.0867815	0.0867815	0.0867815	0.0867815	0.0837554	0.0867815	0.0867815	0.0867815	1.11022e-16
NGY5	0.0777804	0.0777804	0.0777804	0.0777804	0.0777804	0.0777804	0.0777804	0.0777804	0.0777804	0.0777804	0.0777804	0.0777804	0.0777804	0.0777804	0.0777804	0.0777804	0.0777804	0.0777804	0.0777804	0.0748529	0.0777804	0.0777804	0.0777804	0.0777804	0.0777804	0.0777804	0.0807398	0.0777804	0.0777804	0.0777804	0.0205033	0.0205033	0.0181271	0.0157789	0.0205033	0.0157789	0.0181271	0.0181271	0.0181271	0.0181271	0.0181271	0.0205033	0.0181271	0.0181271	0.0181271	0.0777804	0.0777804
NGY7	0.0842299	0.0842299	0.0842299	0.0842299	0.0842299	0.0842299	0.0842299	0.0842299	0.0842299	0.0842299	0.0842299	0.0842299	0.0842299	0.0842299	0.0842299	0.0842299	0.0842299	0.0842299	0.0842299	0.0812156	0.0842299	0.0842299	0.0842299	0.0842299	0.0842299	0.0842299	0.0872773	0.0842299	0.0842299	0.0842299	0.0867815	0.0867815	0.0898409	0.0898686	0.0867815	0.0898686	0.0898409	0.0898409	0.0898409	0.0898409	0.0898409	0.0867815	0.0898409	0.0898409	0.0898409	0.00218506	0.00218506	0.0807398
NGY8	0.0842299	0.0842299	0.0842299	0.0842299	0.0842299	0.0842299	0.0842299	0.0842299	0.0842299	0.0842299	0.0842299	0.0842299	0.0842299	0.0842299	0.0842299	0.0842299	0.0842299	0.0842299	0.0842299	0.0812156	0.0842299	0.0842299	0.0842299	0.0842299	0.0842299	0.0842299	0.0872773	0.0842299	0.0842299	0.0842299	0.0867815	0.0867815	0.0898409	0.0898686	0.0867815	0.0898686	0.0898409	0.0898409	0.0898409	0.0898409	0.0898409	0.0867815	0.0898409	0.0898409	0.0898409	0.00218506	0.00218506	0.0807398	0
NGF7	0.0812156	0.0812156	0.0812156	0.0812156	0.0812156	0.0812156	0.0812156	0.0812156	0.0812156	0.0812156	0.0812156	0.0812156	0.0812156	0.0812156	0.0812156	0.0812156	0.0812156	0.0812156	0.0812156	0.0782339	0.0812156	0.0812156	0.0812156	0.0812156	0.0812156	0.0812156	0.0842299	0.0812156	0.0812156	0.0812156	0.0837554	0.0837554	0.0867815	0.0868074	0.0837554	0.0868074	0.0867815	0.0867815	0.0867815	0.0867815	0.0867815	0.0837554	0.0867815	0.0867815	0.0867815	1.11022e-16	1.11022e-16	0.0777804	0.00218506
NGFA4	0.0777804	0.0777804	0.0777804	0.0777804	0.0777804	0.0777804	0.0777804	0.0777804	0.0777804	0.0777804	0.0777804	0.0777804	0.0777804	0.0777804	0.0777804	0.0777804	0.0777804	0.0777804	0.0777804	0.0748529	0.0777804	0.0777804	0.0777804	0.0777804	0.0777804	0.0777804	0.0807398	0.0777804	0.0777804	0.0777804	0.0205033	0.0205033	0.0181271	0.0157789	0.0205033	0.0157789	0.0181271	0.0181271	0.0181271	0.0181271	0.0181271	0.0205033	0.0181271	0.0181271	0.0181271	0.0777804	0.0777804	0	0.0807398
[truncated: 3 more columns]

## Sheet: S3. Pairwise Distance ITS2
	SWX3	SWX10	SWX12	SWX13	SWX14	SWX15	SWX19	SWX21	SWX22	SWX23	SWX37	SWX40	SWX43	KPGX5	KPGX6	KPGX9	KPGX10	KPGX11	KPGX18	KPGX19	KPGX20	KPGX21	JWX3	JWX17	JWX18	JWX20	KTX7	KTX8	UMPX2	CHX2	BNANX2	BNANX8	BNANX9	BNANX10	BNANX11	BNANX12	BNANX13	BNANX14	BNANX15	BNANX16	BNANX17	BNANX19	BNANX20	BNANX21	BNANX22	NGY1	NGY3	NGY5	NGY7
SWX3
SWX10	0.00432992
SWX12	0	0.00432992
SWX13	0.00877573	0.00434871	0.00877573
SWX14	0.0131914	0.0087253	0.0131914	0.00435755
SWX15	0.00877617	0.00434881	0.00877617	0	0.00433865
SWX19	0.0131914	0.0087253	0.0131914	0.00435755	0	0.00433865
SWX21	0	0.00432992	0	0.00877573	0.0131914	0.00877617	0.0131914
SWX22	0.00877617	0.00434881	0.00877617	0	0.00433865	1.11022e-16	0.00433865	0.00877617
SWX23	0.0131914	0.0087253	0.0131914	0.00435755	0	0.00433865	0	0.0131914	0.00433865
SWX37	0.00873757	0.00432992	0.00873757	0	0.00433865	1.11022e-16	0.00433865	0.00873757	1.11022e-16	0.00433865
SWX40	0.00877617	0.00434881	0.00877617	0	0.00433865	1.11022e-16	0.00433865	0.00877617	1.11022e-16	0.00433865	1.11022e-16
SWX43	0.00873802	0.0132254	0.00873802	0.00877617	0.0131919	0.00877665	0.0131919	0.00873802	0.00877665	0.0131919	0.00873802	0.00877665
KPGX5	0.0176612	0.0131336	0.0176612	0.00872537	0.01316	0.00872551	0.01316	0.0176612	0.00872551	0.01316	0.00868753	0.00872551	0.0176623
KPGX6	0.00877617	0.00434881	0.00877617	0	0.00433865	1.11022e-16	0.00433865	0.00877617	1.11022e-16	0.00433865	1.11022e-16	1.11022e-16	0.00877665	0.00872551
KPGX9	0.00873757	0.00432992	0.00873757	0	0.00433865	1.11022e-16	0.00433865	0.00873757	1.11022e-16	0.00433865	0	1.11022e-16	0.00873802	0.00868753	1.11022e-16
KPGX10	0.00877617	0.00434881	0.00877617	0	0.00433865	1.11022e-16	0.00433865	0.00877617	1.11022e-16	0.00433865	1.11022e-16	1.11022e-16	0.00877665	0.00872551	1.11022e-16	1.11022e-16
KPGX11	0.0131336	0.00868739	0.0131336	0.00433864	0.00873476	0.00433867	0.00873476	0.0131336	0.00433867	0.00873476	0.00431991	0.00433867	0.0131341	0.0131025	0.00433867	0.00431991	0.00433867
KPGX18	0.0132244	0.00873715	0.0132244	0.00434871	0.0087253	0.00434881	0.0087253	0.0132244	0.00434881	0.0087253	0.00432992	0.00434881	0.0132254	0.0131336	0.00434881	0.00432992	0.00434881	0.00868739
KPGX19	0.00877617	0.00434881	0.00877617	0	0.00433865	1.11022e-16	0.00433865	0.00877617	1.11022e-16	0.00433865	1.11022e-16	1.11022e-16	0.00877665	0.00872551	1.11022e-16	1.11022e-16	1.11022e-16	0.00433867	0.00434881
KPGX20	0.00877617	0.00434881	0.00877617	0	0.00433865	1.11022e-16	0.00433865	0.00877617	1.11022e-16	0.00433865	1.11022e-16	1.11022e-16	0.00877665	0.00872551	1.11022e-16	1.11022e-16	1.11022e-16	0.00433867	0.00434881	1.11022e-16
KPGX21	0.00877617	0.00434881	0.00877617	0	0.00433865	1.11022e-16	0.00433865	0.00877617	1.11022e-16	0.00433865	1.11022e-16	1.11022e-16	0.00877665	0.00872551	1.11022e-16	1.11022e-16	1.11022e-16	0.00433867	0.00434881	1.11022e-16	1.11022e-16
JWX3	0.0131914	0.0087253	0.0131914	0.00435755	0	0.00433865	0	0.0131914	0.00433865	0	0.00433865	0.00433865	0.0131919	0.01316	0.00433865	0.00433865	0.00433865	0.00873476	0.0087253	0.00433865	0.00433865	0.00433865
JWX17	0.00873757	0.00432992	0.00873757	0	0.00433865	1.11022e-16	0.00433865	0.00873757	1.11022e-16	0.00433865	0	1.11022e-16	0.00873802	0.00868753	1.11022e-16	0	1.11022e-16	0.00431991	0.00432992	1.11022e-16	1.11022e-16	1.11022e-16	0.00433865
JWX18	0.0131914	0.0087253	0.0131914	0.00435755	0	0.00433865	0	0.0131914	0.00433865	0	0.00433865	0.00433865	0.0131919	0.01316	0.00433865	0.00433865	0.00433865	0.00873476	0.0087253	0.00433865	0.00433865	0.00433865	0	0.00433865
JWX20	0.0131914	0.0087253	0.0131914	0.00435755	0	0.00433865	0	0.0131914	0.00433865	0	0.00433865	0.00433865	0.0131919	0.01316	0.00433865	0.00433865	0.00433865	0.00873476	0.0087253	0.00433865	0.00433865	0.00433865	0	0.00433865	0
KTX7	0.0131336	0.00868739	0.0131336	0.00433864	0.00873476	0.00433867	0.00873476	0.0131336	0.00433867	0.00873476	0.00431991	0.00433867	0.0131341	0.0131025	0.00433867	0.00431991	0.00433867	0	0.00868739	0.00433867	0.00433867	0.00433867	0.00873476	0.00431991	0.00873476	0.00873476
KTX8	0.00877617	0.00434881	0.00877617	0	0.00433865	1.11022e-16	0.00433865	0.00877617	1.11022e-16	0.00433865	1.11022e-16	1.11022e-16	0.00877665	0.00872551	1.11022e-16	1.11022e-16	1.11022e-16	0.00433867	0.00434881	1.11022e-16	1.11022e-16	1.11022e-16	0.00433865	1.11022e-16	0.00433865	0.00433865	0.00433867
UMPX2	0.00873757	0.00432992	0.00873757	0	0.00433865	1.11022e-16	0.00433865	0.00873757	1.11022e-16	0.00433865	0	1.11022e-16	0.00873802	0.00868753	1.11022e-16	0	1.11022e-16	0.00431991	0.00432992	1.11022e-16	1.11022e-16	1.11022e-16	0.00433865	0	0.00433865	0.00433865	0.00431991	1.11022e-16
CHX2	0.0131914	0.0087253	0.0131914	0.00435755	0	0.00433865	0	0.0131914	0.00433865	0	0.00433865	0.00433865	0.0131919	0.01316	0.00433865	0.00433865	0.00433865	0.00873476	0.0087253	0.00433865	0.00433865	0.00433865	0	0.00433865	0	0	0.00873476	0.00433865	0.00433865
BNANX2	0.00868753	0.0131336	0.00868753	0.017739	0.0178747	0.0177401	0.0178747	0.00868753	0.0177401	0.0178747	0.0176612	0.0177401	0.0176623	0.0268081	0.0177401	0.0176612	0.0177401	0.017588	0.0222706	0.0177401	0.0177401	0.0177401	0.0178747	0.0176612	0.0178747	0.0178747	0.017588	0.0177401	0.0176612	0.0178747
BNANX8	0.00868753	0.0131336	0.00868753	0.017739	0.0178747	0.0177401	0.0178747	0.00868753	0.0177401	0.0178747	0.0176612	0.0177401	0.0176623	0.0268081	0.0177401	0.0176612	0.0177401	0.017588	0.0222706	0.0177401	0.0177401	0.0177401	0.0178747	0.0176612	0.0178747	0.0178747	0.017588	0.0177401	0.0176612	0.0178747	0
BNANX9	0.00868753	0.0131336	0.00868753	0.017739	0.0178747	0.0177401	0.0178747	0.00868753	0.0177401	0.0178747	0.0176612	0.0177401	0.0176623	0.0268081	0.0177401	0.0176612	0.0177401	0.017588	0.0222706	0.0177401	0.0177401	0.0177401	0.0178747	0.0176612	0.0178747	0.0178747	0.017588	0.0177401	0.0176612	0.0178747	0	0
BNANX10	0.00868753	0.0131336	0.00868753	0.017739	0.0178747	0.0177401	0.0178747	0.00868753	0.0177401	0.0178747	0.0176612	0.0177401	0.0176623	0.0268081	0.0177401	0.0176612	0.0177401	0.017588	0.0222706	0.0177401	0.0177401	0.0177401	0.0178747	0.0176612	0.0178747	0.0178747	0.017588	0.0177401	0.0176612	0.0178747	0	0	0
BNANX11	0.00868753	0.0131336	0.00868753	0.017739	0.0178747	0.0177401	0.0178747	0.00868753	0.0177401	0.0178747	0.0176612	0.0177401	0.0176623	0.0268081	0.0177401	0.0176612	0.0177401	0.017588	0.0222706	0.0177401	0.0177401	0.0177401	0.0178747	0.0176612	0.0178747	0.0178747	0.017588	0.0177401	0.0176612	0.0178747	0	0	0	0
BNANX12	0.00868753	0.0131336	0.00868753	0.017739	0.0178747	0.0177401	0.0178747	0.00868753	0.0177401	0.0178747	0.0176612	0.0177401	0.0176623	0.0268081	0.0177401	0.0176612	0.0177401	0.017588	0.0222706	0.0177401	0.0177401	0.0177401	0.0178747	0.0176612	0.0178747	0.0178747	0.017588	0.0177401	0.0176612	0.0178747	0	0	0	0	0
BNANX13	0.0131336	0.0176601	0.0131336	0.0223695	0.022549	0.0223714	0.022549	0.0131336	0.0223714	0.022549	0.0222706	0.0223714	0.0222725	0.0315454	0.0223714	0.0222706	0.0223714	0.0221548	0.0269644	0.0223714	0.0223714	0.0223714	0.022549	0.0222706	0.022549	0.022549	0.0221548	0.0223714	0.0222706	0.022549	0.00433003	0.00433003	0.00433003	0.00433003	0.00433003	0.00433003
BNANX14	0.00868753	0.0131336	0.00868753	0.017739	0.0178747	0.0177401	0.0178747	0.00868753	0.0177401	0.0178747	0.0176612	0.0177401	0.0176623	0.0268081	0.0177401	0.0176612	0.0177401	0.017588	0.0222706	0.0177401	0.0177401	0.0177401	0.0178747	0.0176612	0.0178747	0.0178747	0.017588	0.0177401	0.0176612	0.0178747	0	0	0	0	0	0	0.00433003
BNANX15	0.0131341	0.0176612	0.0131341	0.0223714	0.0225521	0.0223734	0.0225521	0.0131341	0.0223734	0.0225521	0.0222725	0.0223734	0.0222746	0.0315486	0.0223734	0.0222725	0.0223734	0.022156	0.0269674	0.0223734	0.0223734	0.0223734	0.0225521	0.0222725	0.0225521	0.0225521	0.022156	0.0223734	0.0222725	0.0225521	0.00433014	0.00433014	0.00433014	0.00433014	0.00433014	0.00433014	0.00873802	0.00433014
BNANX16	0.00868753	0.0131336	0.00868753	0.017739	0.0178747	0.0177401	0.0178747	0.00868753	0.0177401	0.0178747	0.0176612	0.0177401	0.0176623	0.0268081	0.0177401	0.0176612	0.0177401	0.017588	0.0222706	0.0177401	0.0177401	0.0177401	0.0178747	0.0176612	0.0178747	0.0178747	0.017588	0.0177401	0.0176612	0.0178747	0	0	0	0	0	0	0.00433003	0	0.00433014
BNANX17	0.00868753	0.0131336	0.00868753	0.017739	0.0178747	0.0177401	0.0178747	0.00868753	0.0177401	0.0178747	0.0176612	0.0177401	0.0176623	0.0268081	0.0177401	0.0176612	0.0177401	0.017588	0.0222706	0.0177401	0.0177401	0.0177401	0.0178747	0.0176612	0.0178747	0.0178747	0.017588	0.0177401	0.0176612	0.0178747	0	0	0	0	0	0	0.00433003	0	0.00433014	0
BNANX19	0.00868753	0.0131336	0.00868753	0.017739	0.0178747	0.0177401	0.0178747	0.00868753	0.0177401	0.0178747	0.0176612	0.0177401	0.0176623	0.0268081	0.0177401	0.0176612	0.0177401	0.017588	0.0222706	0.0177401	0.0177401	0.0177401	0.0178747	0.0176612	0.0178747	0.0178747	0.017588	0.0177401	0.0176612	0.0178747	0	0	0	0	0	0	0.00433003	0	0.00433014	0	0
BNANX20	0.00868753	0.0131336	0.00868753	0.017739	0.0178747	0.0177401	0.0178747	0.00868753	0.0177401	0.0178747	0.0176612	0.0177401	0.0176623	0.0268081	0.0177401	0.0176612	0.0177401	0.017588	0.0222706	0.0177401	0.0177401	0.0177401	0.0178747	0.0176612	0.0178747	0.0178747	0.017588	0.0177401	0.0176612	0.0178747	0	0	0	0	0	0	0.00433003	0	0.00433014	0	0	0
BNANX21	0.0131341	0.0176612	0.0131341	0.0223714	0.0225521	0.0223734	0.0225521	0.0131341	0.0223734	0.0225521	0.0222725	0.0223734	0.0222746	0.0315486	0.0223734	0.0222725	0.0223734	0.022156	0.0269674	0.0223734	0.0223734	0.0223734	0.0225521	0.0222725	0.0225521	0.0225521	0.022156	0.0223734	0.0222725	0.0225521	0.00433014	0.00433014	0.00433014	0.00433014	0.00433014	0.00433014	0.00873802	0.00433014	0	0.00433014	0.00433014	0.00433014	0.00433014
BNANX22	0.0131336	0.0176601	0.0131336	0.0223695	0.022549	0.0223714	0.022549	0.0131336	0.0223714	0.022549	0.0222706	0.0223714	0.0222725	0.0315454	0.0223714	0.0222706	0.0223714	0.0221548	0.0269644	0.0223714	0.0223714	0.0223714	0.022549	0.0222706	0.022549	0.022549	0.0221548	0.0223714	0.0222706	0.022549	0.00433003	0.00433003	0.00433003	0.00433003	0.00433003	0.00433003	0.00873757	0.00433003	0.00873802	0.00433003	0.00433003	0.00433003	0.00433003	0.00873802
NGY1	0	0.00432992	0	0.00877573	0.0131914	0.00877617	0.0131914	0	0.00877617	0.0131914	0.00873757	0.00877617	0.00873802	0.0176612	0.00877617	0.00873757	0.00877617	0.0131336	0.0132244	0.00877617	0.00877617	0.00877617	0.0131914	0.00873757	0.0131914	0.0131914	0.0131336	0.00877617	0.00873757	0.0131914	0.00868753	0.00868753	0.00868753	0.00868753	0.00868753	0.00868753	0.0131336	0.00868753	0.0131341	0.00868753	0.00868753	0.00868753	0.00868753	0.0131341	0.0131336
NGY3	0.00873757	0.00432992	0.00873757	0	0.00433865	1.11022e-16	0.00433865	0.00873757	1.11022e-16	0.00433865	0	1.11022e-16	0.00873802	0.00868753	1.11022e-16	0	1.11022e-16	0.00431991	0.00432992	1.11022e-16	1.11022e-16	1.11022e-16	0.00433865	0	0.00433865	0.00433865	0.00431991	1.11022e-16	0	0.00433865	0.0176612	0.0176612	0.0176612	0.0176612	0.0176612	0.0176612	0.0222706	0.0176612	0.0222725	0.0176612	0.0176612	0.0176612	0.0176612	0.0222725	0.0222706	0.00873757
NGY5	0.00868753	0.0131336	0.00868753	0.017739	0.0178747	0.0177401	0.0178747	0.00868753	0.0177401	0.0178747	0.0176612	0.0177401	0.0176623	0.0268081	0.0177401	0.0176612	0.0177401	0.017588	0.0222706	0.0177401	0.0177401	0.0177401	0.0178747	0.0176612	0.0178747	0.0178747	0.017588	0.0177401	0.0176612	0.0178747	0	0	0	0	0	0	0.00433003	0	0.00433014	0	0	0	0	0.00433014	0.00433003	0.00868753	0.0176612
NGY7	0.00868753	0.0131336	0.00868753	0.017739	0.0178747	0.0177401	0.0178747	0.00868753	0.0177401	0.0178747	0.0176612	0.0177401	0.0176623	0.0268081	0.0177401	0.0176612	0.0177401	0.017588	0.0222706	0.0177401	0.0177401	0.0177401	0.0178747	0.0176612	0.0178747	0.0178747	0.017588	0.0177401	0.0176612	0.0178747	0	0	0	0	0	0	0.00433003	0	0.00433014	0	0	0	0	0.00433014	0.00433003	0.00868753	0.0176612	0
NGY8	0.00873757	0.00432992	0.00873757	0	0.00433865	1.11022e-16	0.00433865	0.00873757	1.11022e-16	0.00433865	0	1.11022e-16	0.00873802	0.00868753	1.11022e-16	0	1.11022e-16	0.00431991	0.00432992	1.11022e-16	1.11022e-16	1.11022e-16	0.00433865	0	0.00433865	0.00433865	0.00431991	1.11022e-16	0	0.00433865	0.0176612	0.0176612	0.0176612	0.0176612	0.0176612	0.0176612	0.0222706	0.0176612	0.0222725	0.0176612	0.0176612	0.0176612	0.0176612	0.0222725	0.0222706	0.00873757	0	0.0176612	0.0176612
NGF7	0.00432992	0	0.00432992	0.00434871	0.0087253	0.00434881	0.0087253	0.00432992	0.00434881	0.0087253	0.00432992	0.00434881	0.0132254	0.0131336	0.00434881	0.00432992	0.00434881	0.00868739	0.00873715	0.00434881	0.00434881	0.00434881	0.0087253	0.00432992	0.0087253	0.0087253	0.00868739	0.00434881	0.00432992	0.0087253	0.0131336	0.0131336	0.0131336	0.0131336	0.0131336	0.0131336	0.0176601	0.0131336	0.0176612	0.0131336	0.0131336	0.0131336	0.0131336	0.0176612	0.0176601	0.00432992	0.00432992	0.0131336	0.0131336
NGFA4	0.00873757	0.00432992	0.00873757	0	0.00433865	1.11022e-16	0.00433865	0.00873757	1.11022e-16	0.00433865	0	1.11022e-16	0.00873802	0.00868753	1.11022e-16	0	1.11022e-16	0.00431991	0.00432992	1.11022e-16	1.11022e-16	1.11022e-16	0.00433865	0	0.00433865	0.00433865	0.00431991	1.11022e-16	0	0.00433865	0.0176612	0.0176612	0.0176612	0.0176612	0.0176612	0.0176612	0.0222706	0.0176612	0.0222725	0.0176612	0.0176612	0.0176612	0.0176612	0.0222725	0.0222706	0.00873757	0	0.0176612	0.0176612
[truncated: 3 more columns]

## Sheet: S4. Pairwise Distance 18S 
	SWX3	SWX10	SWX12	SWX13	SWX14	SWX15	SWX19	SWX21	SWX22	SWX23	SWX37	SWX40	SWX43	KPGX5	KPGX6	KPGX9	KPGX10	KPGX11	KPGX18	KPGX19	KPGX20	KPGX21	JWX3	JWX17	JWX18	JWX20	KTX7	KTX8	UMPX2	CHX2	BNANX2	BNANX8	BNANX9	BNANX10	BNANX11	BNANX12	BNANX13	BNANX14	BNANX15	BNANX16	BNANX17	BNANX19	BNANX20	BNANX21	BNANX22	NGY1	NGY3	NGY5	NGY7
SWX3
SWX10	0
SWX12	0	0
SWX13	0.00152092	0.00152092	0.00152092
SWX14	0.00152092	0.00152092	0.00152092	0
SWX15	0.00152092	0.00152092	0.00152092	0	0
SWX19	0.00152092	0.00152092	0.00152092	0	0	0
SWX21	0	0	0	0.00152092	0.00152092	0.00152092	0.00152092
SWX22	0.00152092	0.00152092	0.00152092	0	0	0	0	0.00152092
SWX23	0.00152092	0.00152092	0.00152092	0	0	0	0	0.00152092	0
SWX37	0.00152092	0.00152092	0.00152092	0	0	0	0	0.00152092	0	0
SWX40	0.00152092	0.00152092	0.00152092	0	0	0	0	0.00152092	0	0	0
SWX43	0.00152092	0.00152092	0.00152092	0	0	0	0	0.00152092	0	0	0	0
KPGX5	0.00152092	0.00152092	0.00152092	0	0	0	0	0.00152092	0	0	0	0	0
KPGX6	0.00152092	0.00152092	0.00152092	0	0	0	0	0.00152092	0	0	0	0	0	0
KPGX9	0.00152092	0.00152092	0.00152092	0	0	0	0	0.00152092	0	0	0	0	0	0	0
KPGX10	0.00152092	0.00152092	0.00152092	0	0	0	0	0.00152092	0	0	0	0	0	0	0	0
KPGX11	0.00152092	0.00152092	0.00152092	0	0	0	0	0.00152092	0	0	0	0	0	0	0	0	0
KPGX18	0.00152324	0.00152324	0.00152324	0	0	0	0	0.00152324	0	0	0	0	0	0	0	0	0	0
KPGX19	0.00152092	0.00152092	0.00152092	0	0	0	0	0.00152092	0	0	0	0	0	0	0	0	0	0	0
KPGX20	0.00152092	0.00152092	0.00152092	0	0	0	0	0.00152092	0	0	0	0	0	0	0	0	0	0	0	0
KPGX21	0.00152092	0.00152092	0.00152092	0	0	0	0	0.00152092	0	0	0	0	0	0	0	0	0	0	0	0	0
JWX3	0.00152092	0.00152092	0.00152092	0	0	0	0	0.00152092	0	0	0	0	0	0	0	0	0	0	0	0	0	0
JWX17	0.00152092	0.00152092	0.00152092	0	0	0	0	0.00152092	0	0	0	0	0	0	0	0	0	0	0	0	0	0	0
JWX18	0.00152092	0.00152092	0.00152092	0	0	0	0	0.00152092	0	0	0	0	0	0	0	0	0	0	0	0	0	0	0	0
JWX20	0.00152092	0.00152092	0.00152092	0	0	0	0	0.00152092	0	0	0	0	0	0	0	0	0	0	0	0	0	0	0	0	0
KTX7	0.00152092	0.00152092	0.00152092	0	0	0	0	0.00152092	0	0	0	0	0	0	0	0	0	0	0	0	0	0	0	0	0	0
KTX8	0.00152092	0.00152092	0.00152092	0	0	0	0	0.00152092	0	0	0	0	0	0	0	0	0	0	0	0	0	0	0	0	0	0	0
UMPX2	0.00152092	0.00152092	0.00152092	0	0	0	0	0.00152092	0	0	0	0	0	0	0	0	0	0	0	0	0	0	0	0	0	0	0	0
CHX2	0.00152092	0.00152092	0.00152092	0	0	0	0	0.00152092	0	0	0	0	0	0	0	0	0	0	0	0	0	0	0	0	0	0	0	0	0
BNANX2	0	0	0	0.00152092	0.00152092	0.00152092	0.00152092	0	0.00152092	0.00152092	0.00152092	0.00152092	0.00152092	0.00152092	0.00152092	0.00152092	0.00152092	0.00152092	0.00152324	0.00152092	0.00152092	0.00152092	0.00152092	0.00152092	0.00152092	0.00152092	0.00152092	0.00152092	0.00152092	0.00152092
BNANX8	0	0	0	0.00152092	0.00152092	0.00152092	0.00152092	0	0.00152092	0.00152092	0.00152092	0.00152092	0.00152092	0.00152092	0.00152092	0.00152092	0.00152092	0.00152092	0.00152324	0.00152092	0.00152092	0.00152092	0.00152092	0.00152092	0.00152092	0.00152092	0.00152092	0.00152092	0.00152092	0.00152092	0
BNANX9	0	0	0	0.00152092	0.00152092	0.00152092	0.00152092	0	0.00152092	0.00152092	0.00152092	0.00152092	0.00152092	0.00152092	0.00152092	0.00152092	0.00152092	0.00152092	0.00152324	0.00152092	0.00152092	0.00152092	0.00152092	0.00152092	0.00152092	0.00152092	0.00152092	0.00152092	0.00152092	0.00152092	0	0
BNANX10	0	0	0	0.00152092	0.00152092	0.00152092	0.00152092	0	0.00152092	0.00152092	0.00152092	0.00152092	0.00152092	0.00152092	0.00152092	0.00152092	0.00152092	0.00152092	0.00152324	0.00152092	0.00152092	0.00152092	0.00152092	0.00152092	0.00152092	0.00152092	0.00152092	0.00152092	0.00152092	0.00152092	0	0	0
BNANX11	0	0	0	0.00152092	0.00152092	0.00152092	0.00152092	0	0.00152092	0.00152092	0.00152092	0.00152092	0.00152092	0.00152092	0.00152092	0.00152092	0.00152092	0.00152092	0.00152324	0.00152092	0.00152092	0.00152092	0.00152092	0.00152092	0.00152092	0.00152092	0.00152092	0.00152092	0.00152092	0.00152092	0	0	0	0
BNANX12	0	0	0	0.00152092	0.00152092	0.00152092	0.00152092	0	0.00152092	0.00152092	0.00152092	0.00152092	0.00152092	0.00152092	0.00152092	0.00152092	0.00152092	0.00152092	0.00152324	0.00152092	0.00152092	0.00152092	0.00152092	0.00152092	0.00152092	0.00152092	0.00152092	0.00152092	0.00152092	0.00152092	0	0	0	0	0
BNANX13	0	0	0	0.00152092	0.00152092	0.00152092	0.00152092	0	0.00152092	0.00152092	0.00152092	0.00152092	0.00152092	0.00152092	0.00152092	0.00152092	0.00152092	0.00152092	0.00152324	0.00152092	0.00152092	0.00152092	0.00152092	0.00152092	0.00152092	0.00152092	0.00152092	0.00152092	0.00152092	0.00152092	0	0	0	0	0	0
BNANX14	0	0	0	0.00152092	0.00152092	0.00152092	0.00152092	0	0.00152092	0.00152092	0.00152092	0.00152092	0.00152092	0.00152092	0.00152092	0.00152092	0.00152092	0.00152092	0.00152324	0.00152092	0.00152092	0.00152092	0.00152092	0.00152092	0.00152092	0.00152092	0.00152092	0.00152092	0.00152092	0.00152092	0	0	0	0	0	0	0
BNANX15	0	0	0	0.00152092	0.00152092	0.00152092	0.00152092	0	0.00152092	0.00152092	0.00152092	0.00152092	0.00152092	0.00152092	0.00152092	0.00152092	0.00152092	0.00152092	0.00152324	0.00152092	0.00152092	0.00152092	0.00152092	0.00152092	0.00152092	0.00152092	0.00152092	0.00152092	0.00152092	0.00152092	0	0	0	0	0	0	0	0
BNANX16	0	0	0	0.00152092	0.00152092	0.00152092	0.00152092	0	0.00152092	0.00152092	0.00152092	0.00152092	0.00152092	0.00152092	0.00152092	0.00152092	0.00152092	0.00152092	0.00152324	0.00152092	0.00152092	0.00152092	0.00152092	0.00152092	0.00152092	0.00152092	0.00152092	0.00152092	0.00152092	0.00152092	0	0	0	0	0	0	0	0	0
BNANX17	0	0	0	0.00152092	0.00152092	0.00152092	0.00152092	0	0.00152092	0.00152092	0.00152092	0.00152092	0.00152092	0.00152092	0.00152092	0.00152092	0.00152092	0.00152092	0.00152324	0.00152092	0.00152092	0.00152092	0.00152092	0.00152092	0.00152092	0.00152092	0.00152092	0.00152092	0.00152092	0.00152092	0	0	0	0	0	0	0	0	0	0
BNANX19	0	0	0	0.00152092	0.00152092	0.00152092	0.00152092	0	0.00152092	0.00152092	0.00152092	0.00152092	0.00152092	0.00152092	0.00152092	0.00152092	0.00152092	0.00152092	0.00152324	0.00152092	0.00152092	0.00152092	0.00152092	0.00152092	0.00152092	0.00152092	0.00152092	0.00152092	0.00152092	0.00152092	0	0	0	0	0	0	0	0	0	0	0
BNANX20	0	0	0	0.00152092	0.00152092	0.00152092	0.00152092	0	0.00152092	0.00152092	0.00152092	0.00152092	0.00152092	0.00152092	0.00152092	0.00152092	0.00152092	0.00152092	0.00152324	0.00152092	0.00152092	0.00152092	0.00152092	0.00152092	0.00152092	0.00152092	0.00152092	0.00152092	0.00152092	0.00152092	0	0	0	0	0	0	0	0	0	0	0	0
BNANX21	0	0	0	0.00152092	0.00152092	0.00152092	0.00152092	0	0.00152092	0.00152092	0.00152092	0.00152092	0.00152092	0.00152092	0.00152092	0.00152092	0.00152092	0.00152092	0.00152324	0.00152092	0.00152092	0.00152092	0.00152092	0.00152092	0.00152092	0.00152092	0.00152092	0.00152092	0.00152092	0.00152092	0	0	0	0	0	0	0	0	0	0	0	0	0
BNANX22	0	0	0	0.00152092	0.00152092	0.00152092	0.00152092	0	0.00152092	0.00152092	0.00152092	0.00152092	0.00152092	0.00152092	0.00152092	0.00152092	0.00152092	0.00152092	0.00152324	0.00152092	0.00152092	0.00152092	0.00152092	0.00152092	0.00152092	0.00152092	0.00152092	0.00152092	0.00152092	0.00152092	0	0	0	0	0	0	0	0	0	0	0	0	0	0
NGY1	0.00152092	0.00152092	0.00152092	0	0	0	0	0.00152092	0	0	0	0	0	0	0	0	0	0	0	0	0	0	0	0	0	0	0	0	0	0	0.00152092	0.00152092	0.00152092	0.00152092	0.00152092	0.00152092	0.00152092	0.00152092	0.00152092	0.00152092	0.00152092	0.00152092	0.00152092	0.00152092	0.00152092
NGY3	0.00152092	0.00152092	0.00152092	0	0	0	0	0.00152092	0	0	0	0	0	0	0	0	0	0	0	0	0	0	0	0	0	0	0	0	0	0	0.00152092	0.00152092	0.00152092	0.00152092	0.00152092	0.00152092	0.00152092	0.00152092	0.00152092	0.00152092	0.00152092	0.00152092	0.00152092	0.00152092	0.00152092	0
NGY5	0.00152092	0.00152092	0.00152092	0	0	0	0	0.00152092	0	0	0	0	0	0	0	0	0	0	0	0	0	0	0	0	0	0	0	0	0	0	0.00152092	0.00152092	0.00152092	0.00152092	0.00152092	0.00152092	0.00152092	0.00152092	0.00152092	0.00152092	0.00152092	0.00152092	0.00152092	0.00152092	0.00152092	0	0
NGY7	0.00152092	0.00152092	0.00152092	0	0	0	0	0.00152092	0	0	0	0	0	0	0	0	0	0	0	0	0	0	0	0	0	0	0	0	0	0	0.00152092	0.00152092	0.00152092	0.00152092	0.00152092	0.00152092	0.00152092	0.00152092	0.00152092	0.00152092	0.00152092	0.00152092	0.00152092	0.00152092	0.00152092	0	0	0
NGY8	0.00152092	0.00152092	0.00152092	0	0	0	0	0.00152092	0	0	0	0	0	0	0	0	0	0	0	0	0	0	0	0	0	0	0	0	0	0	0.00152092	0.00152092	0.00152092	0.00152092	0.00152092	0.00152092	0.00152092	0.00152092	0.00152092	0.00152092	0.00152092	0.00152092	0.00152092	0.00152092	0.00152092	0	0	0	0
NGF7	0.00152092	0.00152092	0.00152092	0	0	0	0	0.00152092	0	0	0	0	0	0	0	0	0	0	0	0	0	0	0	0	0	0	0	0	0	0	0.00152092	0.00152092	0.00152092	0.00152092	0.00152092	0.00152092	0.00152092	0.00152092	0.00152092	0.00152092	0.00152092	0.00152092	0.00152092	0.00152092	0.00152092	0	0	0	0
NGFA4	0.00152092	0.00152092	0.00152092	0	0	0	0	0.00152092	0	0	0	0	0	0	0	0	0	0	0	0	0	0	0	0	0	0	0	0	0	0	0.00152092	0.00152092	0.00152092	0.00152092	0.00152092	0.00152092	0.00152092	0.00152092	0.00152092	0.00152092	0.00152092	0.00152092	0.00152092	0.00152092	0.00152092	0	0	0	0
[truncated: 3 more columns]

## Sheet: S5. Haplotype frequency COI
	SWCC	BJV	KTP	JWCC	BNAN	CHINA
Hap_1	13	8	3	4	0	0
Hap_2	0	1	0	0	0	0
Hap_3	0	0	1	0	0	0
Hap_4	0	0	0	0	4	0
Hap_5	0	0	0	0	9	0
Hap_6	0	0	0	0	2	0
Hap_7	0	0	0	0	0	3
Hap_8	0	0	0	0	0	2
Hap_9	0	0	0	0	0	2

## Sheet: S6. Haplotype frequency ITS2
	SWCC	BJV	KTP	JWCC	BNAN	CHINA
Hap_1	3	0	0	0	0	1
Hap_2	1	0	0	0	0	1
Hap_3	5	6	2	1	0	3
Hap_4	3	0	1	3	0	0
Hap_5	1	0	0	0	0	0
Hap_6	0	1	0	0	0	0
Hap_7	0	1	1	0	0	0
Hap_8	0	1	0	0	0	0
Hap_9	0	0	0	0	11	2
Hap_10	0	0	0	0	1	0
Hap_11	0	0	0	0	2	0
Hap_12	0	0	0	0	1	0

## Sheet: S7. Haplotype frequency 18S
	SWCC	BJV	KTP	JWCC	BNAN	CHINA
Hap_1	4	0	0	0	15	0
Hap_2	9	9	4	4	0	7
